# Supplementary material for: Dimensionality and factorial invariance of religiosity among Christians and the religiously unaffiliated: A cross-cultural analysis based on the International Social Survey Programme
Source: PLOS journal article supplement (doi:10.1371/journal.pone.0216352), 2019-05-15
Supplement: S8 (10.1371/journal.pone.0216352.s008) [file journal.pone.0216352.s008]

| Grouping | Model   | $\chi^2$ | $df$ | $\frac{\chi^2}{df}$ | $p$ -value | $\Delta\chi^2$ | $\Delta df$ | $\Pr(> \chi^2)$ | CFI   | RMSEA (90% c.i.)     | SRMR  |
|----------|---------|----------|------|---------------------|------------|----------------|-------------|-----------------|-------|----------------------|-------|
| SEX      | config  | 1436.9   | 62   | 23                  | < 0.001    | –              | –           | –               | 0.999 | 0.041 (0.040,0.043)  | 0.018 |
|          | metric  | 1459.5   | 83   | 18                  | < 0.001    | 64.4           | 21          | < 0.001         | 0.999 | 0.036 (0.034,0.037)  | 0.018 |
|          | scalar  | 1701.2   | 90   | 19                  | < 0.001    | 434.1          | 7           | < 0.001         | 0.999 | 0.037 (0.036,0.039)  | 0.018 |
|          | strict  | 1881.2   | 100  | 19                  | < 0.001    | 114.4          | 10          | < 0.001         | 0.999 | 0.037 (0.036,0.039)  | 0.019 |
| AGE      | config  | 1422.4   | 155  | 9                   | < 0.001    | –              | –           | –               | 0.999 | 0.040 (0.038,0.042)  | 0.018 |
|          | metric  | 1615.9   | 239  | 7                   | < 0.001    | 439.1          | 84          | < 0.001         | 0.999 | 0.033 (0.032,0.035)  | 0.018 |
|          | scalar  | 2074.4   | 267  | 8                   | < 0.001    | 622.4          | 28          | < 0.001         | 0.999 | 0.036 (0.035,0.038)  | 0.018 |
|          | strict  | 2562.2   | 307  | 8                   | < 0.001    | 234.9          | 40          | < 0.001         | 0.999 | 0.038 (0.036,0.039)  | 0.021 |
| DEGREE   | config  | 1571.0   | 186  | 8                   | < 0.001    | –              | –           | –               | 0.999 | 0.042 (0.040,0.043)  | 0.019 |
|          | metric  | 1851.8   | 291  | 6                   | < 0.001    | 626.6          | 105         | < 0.001         | 0.999 | 0.035 (0.034,0.037)  | 0.019 |
|          | scalar  | 2382.6   | 326  | 7                   | < 0.001    | 706.0          | 35          | < 0.001         | 0.999 | 0.038 (0.037,0.040)  | 0.019 |
|          | strict  | 3180.8   | 376  | 8                   | < 0.001    | 412.2          | 50          | < 0.001         | 0.999 | 0.042 (0.040,0.043)  | 0.022 |
| RELIGGRP | config  | 1798.9   | 155  | 12                  | < 0.001    | –              | –           | –               | 0.999 | 0.045 (0.043,0.047)  | 0.026 |
|          | metric  | 3249.0   | 239  | 14                  | < 0.001    | 2518.5         | 84          | < 0.001         | 0.998 | 0.049 (0.048,0.051)  | 0.027 |
|          | scalar  | 4908.9   | 267  | 18                  | < 0.001    | 1532.0         | 28          | < 0.001         | 0.996 | 0.058 (0.057,0.059)  | 0.030 |
|          | strict  | 6967.1   | 307  | 23                  | < 0.001    | 1124.8         | 40          | < 0.001         | 0.995 | 0.065 (0.063,0.066)  | 0.038 |
| COUNTRY  | config  | 2679.9   | 744  | 4                   | < 0.001    | –              | –           | –               | 0.999 | 0.051 (0.049, 0.053) | 0.031 |
|          | metric  | 6047.1   | 1227 | 5                   | < 0.001    | 5671.8         | 483         | < 0.001         | 0.998 | 0.062 (0.061,0.064)  | 0.033 |
|          | scalar  | 10512.9  | 1388 | 8                   | < 0.001    | 4829.1         | 161         | < 0.001         | 0.996 | 0.081 (0.079,0.082)  | 0.034 |
|          | strict* | –        | –    | –                   | –          | –              | –           | –               | –     | –                    | –     |

\* Solution invalid due to covariance matrix of latent variables not positive definite for Norway and Sweden.
