# Supplementary material for: Dimensionality and factorial invariance of religiosity among Christians and the religiously unaffiliated: A cross-cultural analysis based on the International Social Survey Programme
Source: PLOS journal article supplement (doi:10.1371/journal.pone.0216352), 2019-05-15
Supplement: S10 (10.1371/journal.pone.0216352.s010) [file journal.pone.0216352.s010]

| Grouping | Model   | $\chi^2$ | $df$ | $\frac{\chi^2}{df}$ | $p$ -value | $\Delta\chi^2$ | $\Delta df$ | $\Pr(> \chi^2)$ | CFI   | RMSEA (90% c.i.)    | SRMR  |
|----------|---------|----------|------|---------------------|------------|----------------|-------------|-----------------|-------|---------------------|-------|
| SEX      | config  | 1949.1   | 64   | 30                  | < 0.001    | –              | –           | –               | 0.999 | 0.048 (0.046,0.050) | 0.022 |
|          | metric  | 1970.4   | 84   | 23                  | < 0.001    | 61.5           | 20          | < 0.001         | 0.999 | 0.042 (0.040,0.043) | 0.022 |
|          | scalar  | 2232.3   | 91   | 25                  | < 0.001    | 470.9          | 7           | < 0.001         | 0.999 | 0.043 (0.041,0.044) | 0.022 |
|          | strict  | 2416.1   | 101  | 24                  | < 0.001    | 117.3          | 10          | < 0.001         | 0.999 | 0.042 (0.041,0.044) | 0.022 |
| AGE      | config  | 1874.3   | 160  | 12                  | < 0.001    | –              | –           | –               | 0.999 | 0.046 (0.044,0.047) | 0.021 |
|          | metric  | 2057.1   | 240  | 9                   | < 0.001    | 422.3          | 80          | < 0.001         | 0.999 | 0.038 (0.037,0.040) | 0.021 |
|          | scalar  | 2541.5   | 268  | 9                   | < 0.001    | 653.7          | 28          | < 0.001         | 0.999 | 0.041 (0.039,0.042) | 0.021 |
|          | strict  | 3028.2   | 308  | 10                  | < 0.001    | 233.2          | 40          | < 0.001         | 0.999 | 0.041 (0.040,0.043) | 0.023 |
| DEGREE   | config  | 2068.9   | 192  | 11                  | < 0.001    | –              | –           | –               | 0.999 | 0.048 (0.046,0.050) | 0.022 |
|          | metric  | 2309.9   | 292  | 8                   | < 0.001    | 550.4          | 100         | < 0.001         | 0.999 | 0.040 (0.039,0.042) | 0.022 |
|          | scalar  | 2861.8   | 327  | 9                   | < 0.001    | 730.6          | 35          | < 0.001         | 0.999 | 0.042 (0.041,0.044) | 0.022 |
|          | strict  | 3687.3   | 377  | 10                  | < 0.001    | 425.1          | 50          | < 0.001         | 0.998 | 0.045 (0.044,0.046) | 0.025 |
| RELIGGRP | config  | 2374.4   | 160  | 15                  | < 0.001    | –              | –           | –               | 0.998 | 0.052 (0.050,0.054) | 0.031 |
|          | metric  | 3750.5   | 240  | 16                  | < 0.001    | 2423.2         | 80          | < 0.001         | 0.997 | 0.053 (0.052,0.055) | 0.032 |
|          | scalar  | 5543.6   | 268  | 21                  | < 0.001    | 1637.3         | 28          | < 0.001         | 0.996 | 0.062 (0.060,0.063) | 0.034 |
|          | strict  | 7680.3   | 308  | 25                  | < 0.001    | 1139.7         | 40          | < 0.001         | 0.994 | 0.068 (0.067,0.069) | 0.043 |
| COUNTRY  | config  | 3122.1   | 768  | 4                   | < 0.001    | –              | –           | –               | 0.999 | 0.055 (0.053,0.057) | 0.034 |
|          | metric  | 6330.0   | 1228 | 5                   | < 0.001    | 5532.2         | 460         | < 0.001         | 0.998 | 0.064 (0.063,0.066) | 0.036 |
|          | scalar  | 10922.0  | 1389 | 8                   | < 0.001    | 4961.8         | 161         | < 0.001         | 0.996 | 0.083 (0.081,0.084) | 0.036 |
|          | strict* | –        | –    | –                   | –          | –              | –           | –               | –     | –                   | –     |

\* Solution invalid due to covariance matrix of latent variables not positive definite for Norway and Sweden.
